# Supplementary material for: Sarcopenia Adversely Affects Outcomes following Cardiac Surgery: A Systematic Review and Meta-Analysis
Source: MDPI journal article supplement (doi:10.3390/jcm12175573), 2023-08-26
Supplement: s1 [file s1]

## Supplementary File 1

Supplementary Figure S1: Overall Surgery Duration.

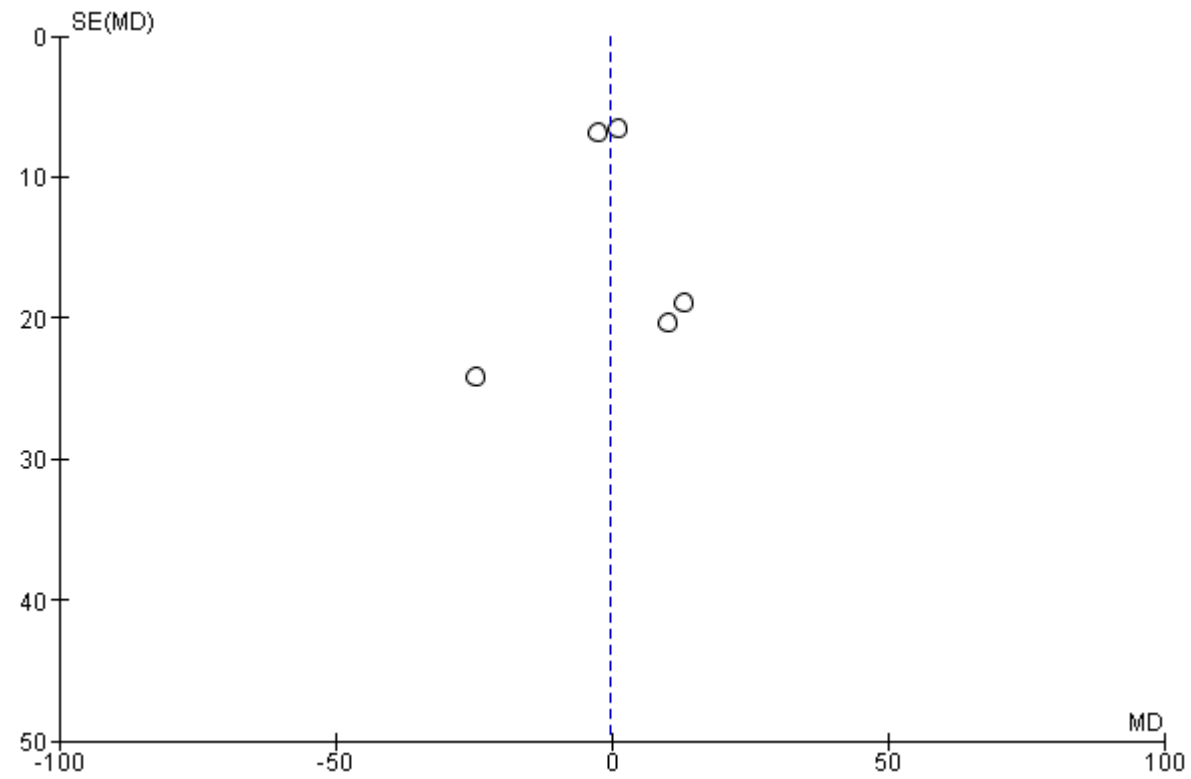

Supplementary Figure S2: CBP Time.

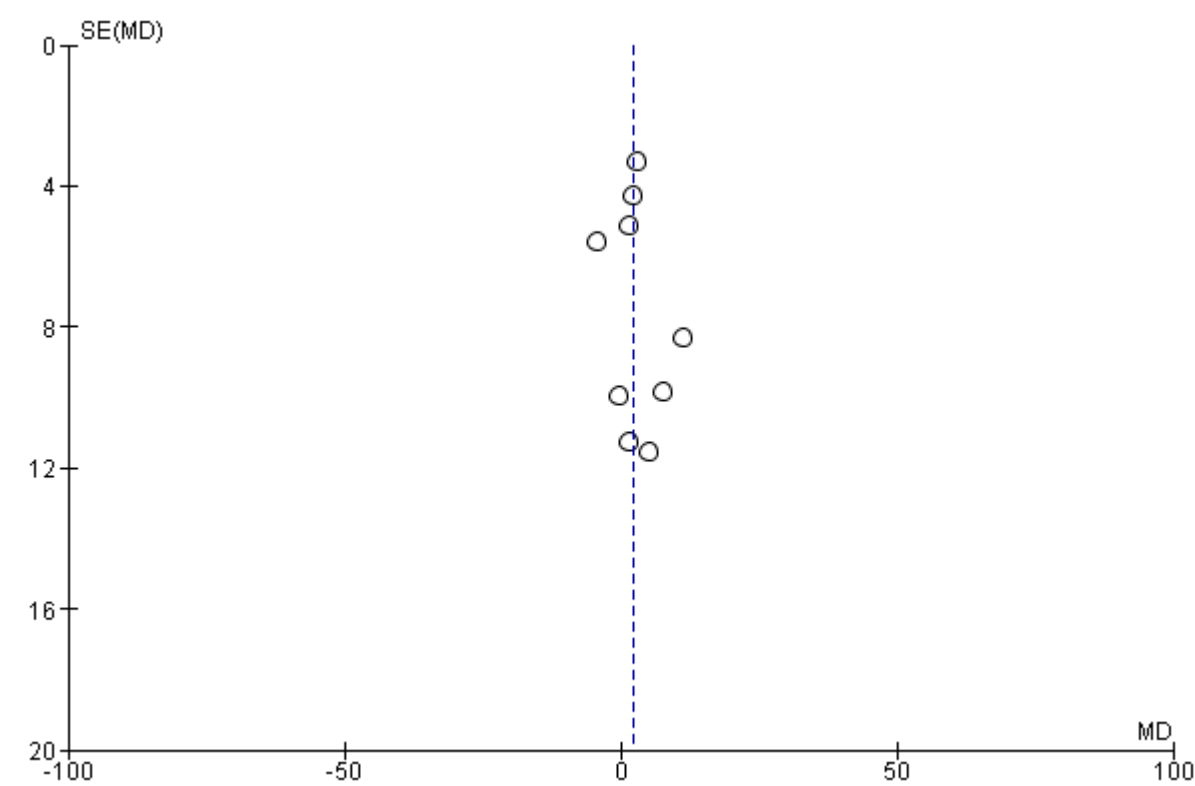

Supplementary Figure S3: CC Time.

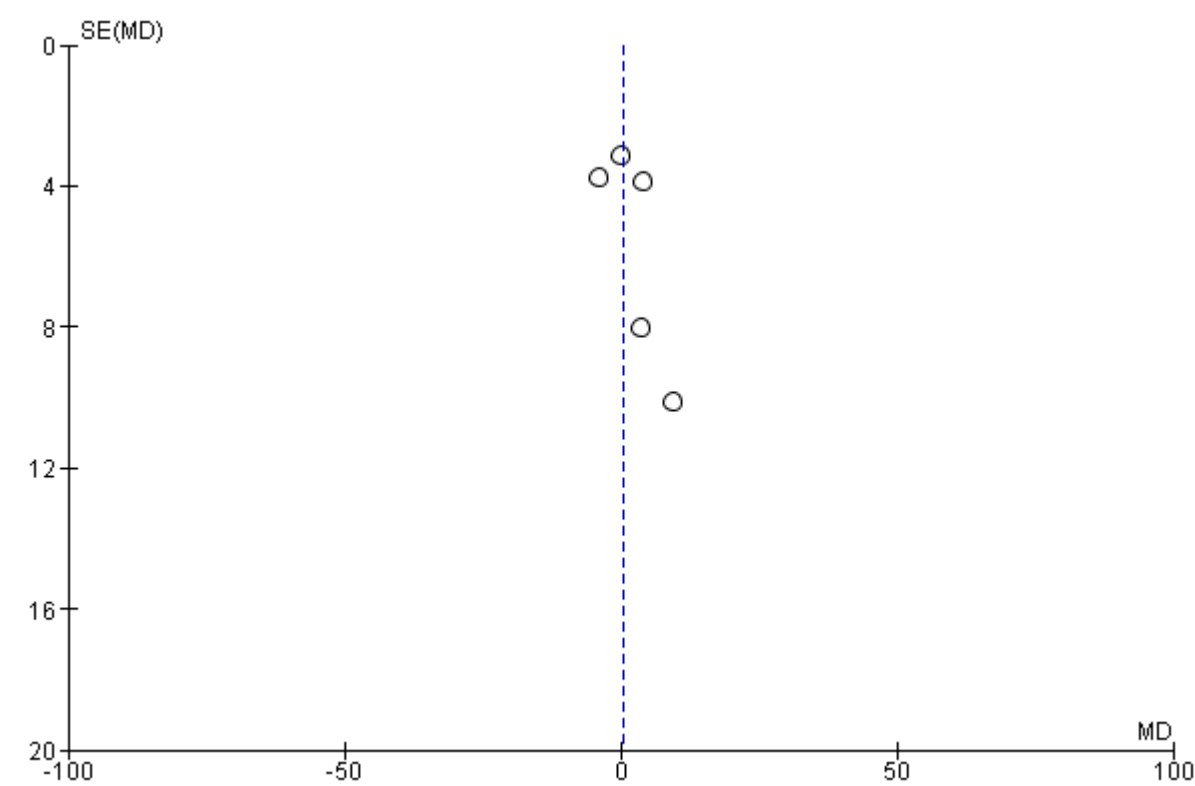

Supplementary Figure S4: Hospital LOS.

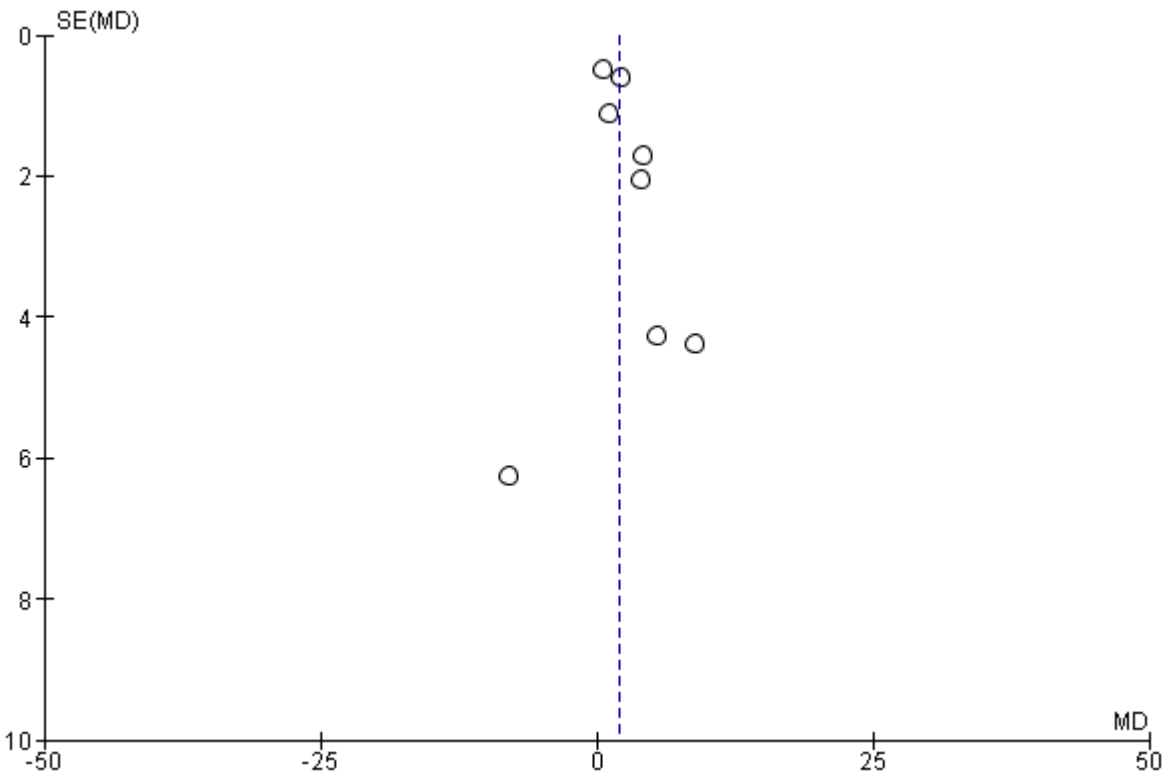

Supplementary Figure S5: ICU LOS.

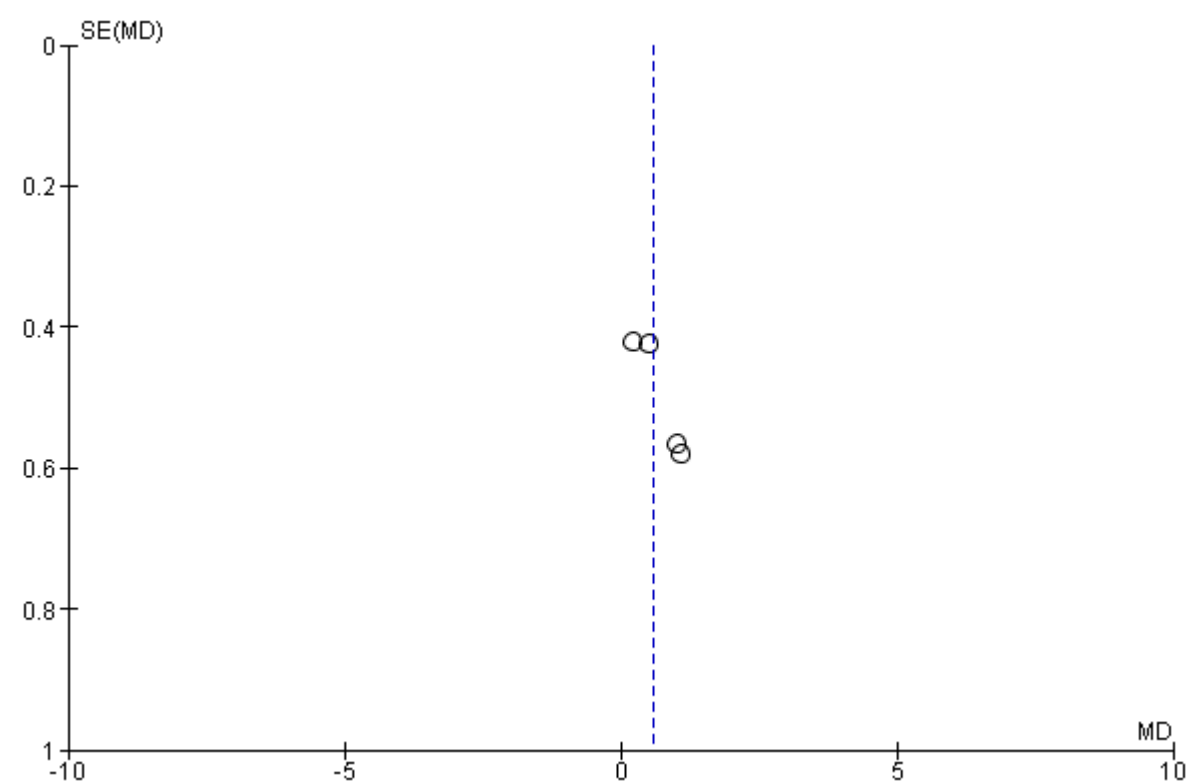

Supplementary Figure S6: In hospital mortality.

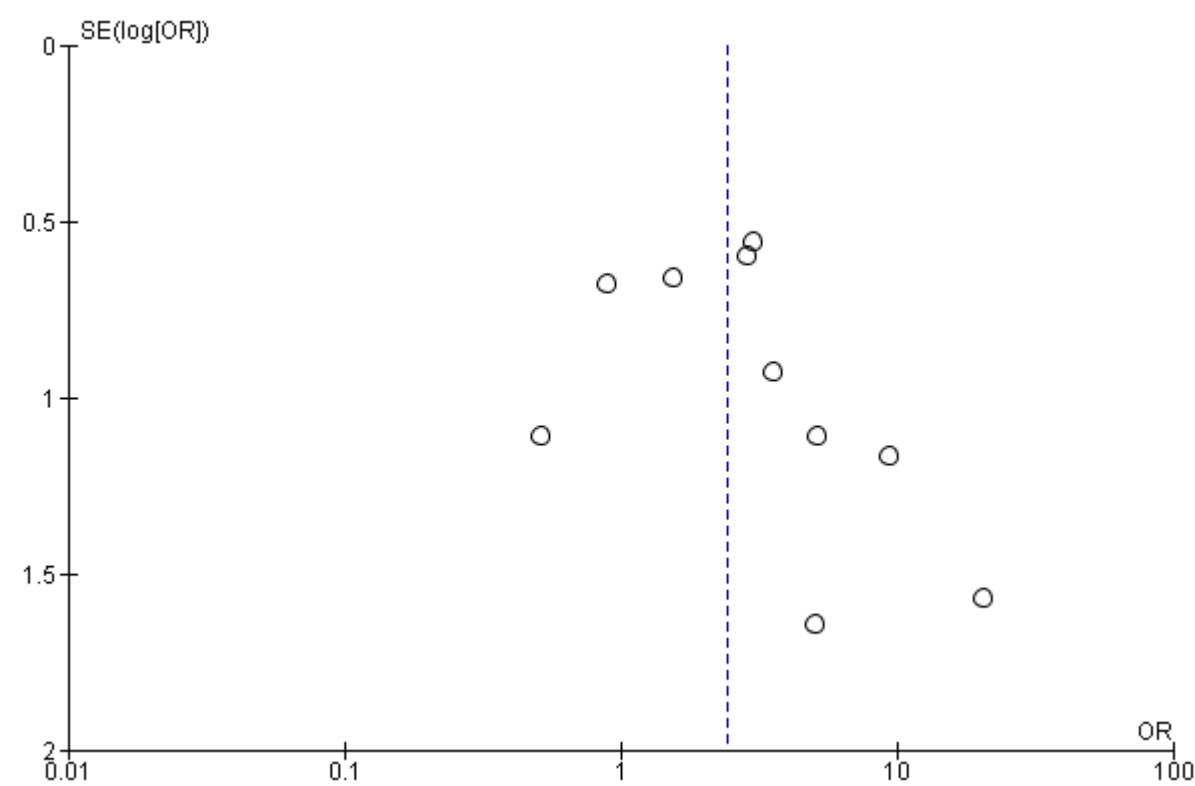

Supplementary Figure S7: Early mortality.

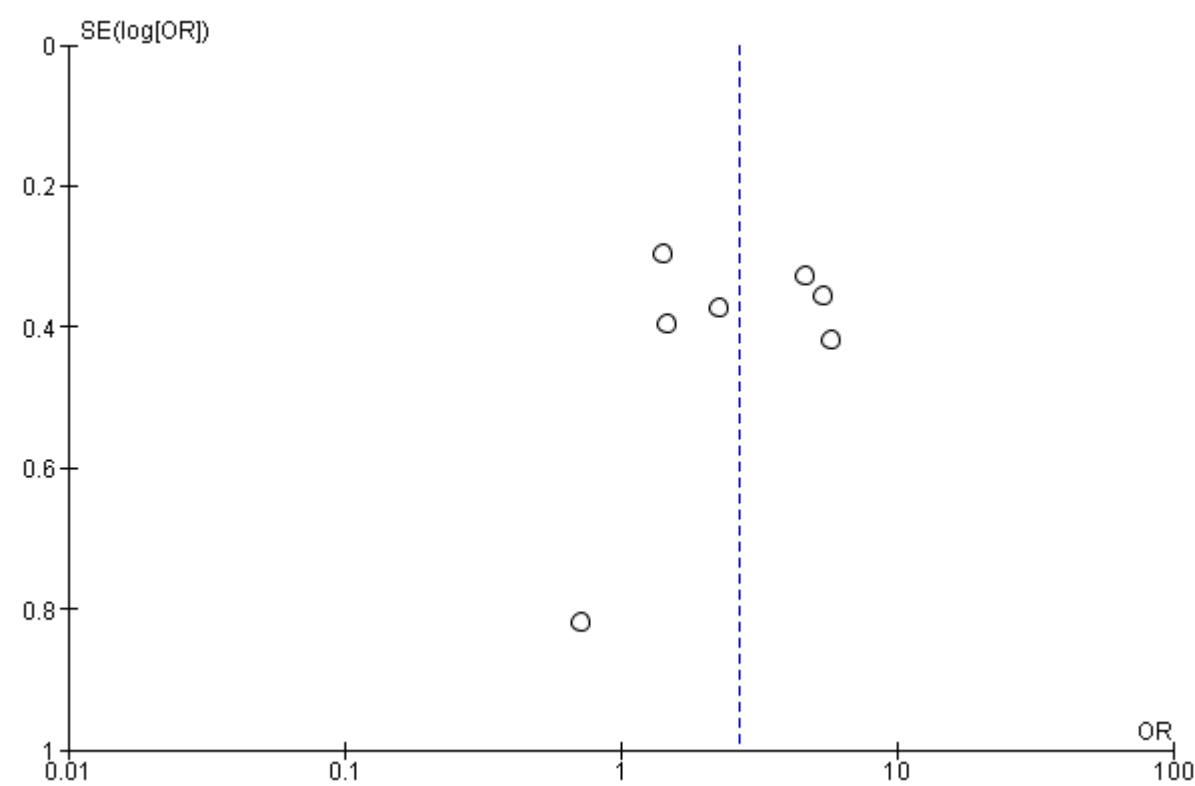

Supplementary Figure S8: Late mortality.

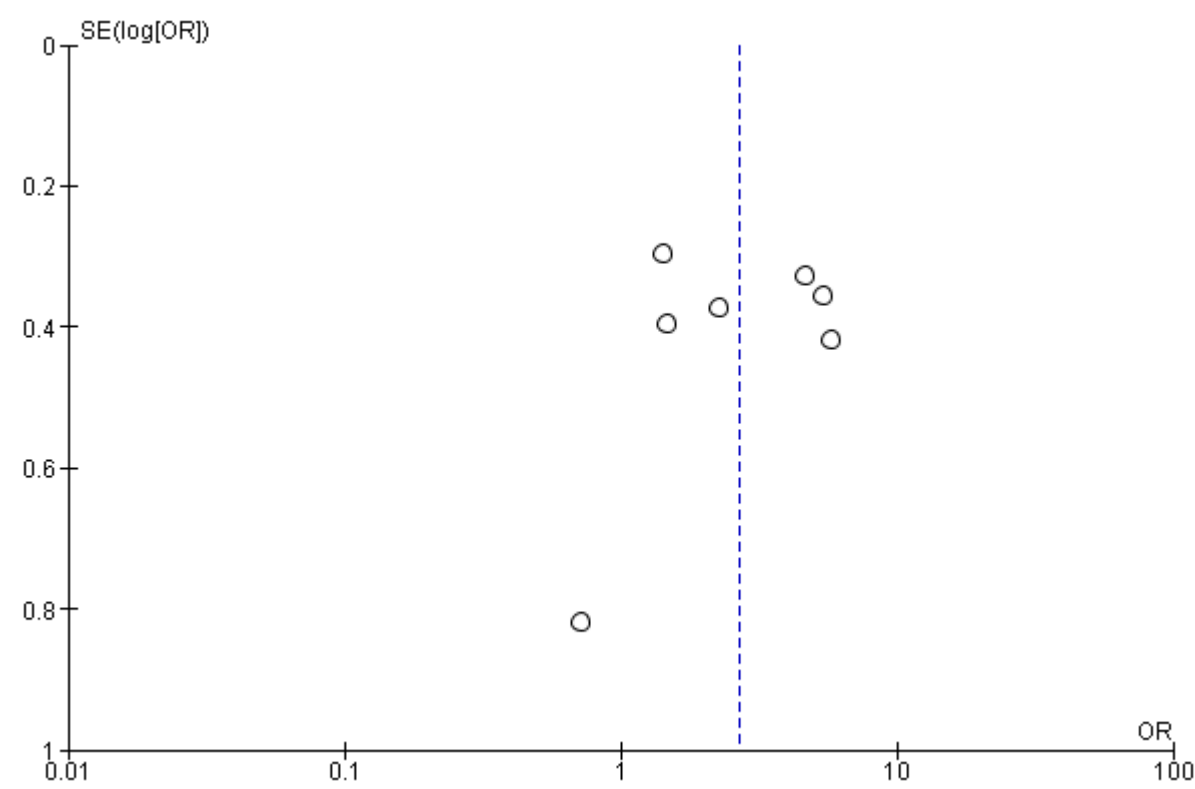



Supplementary Figure S9: Arrhythmia.

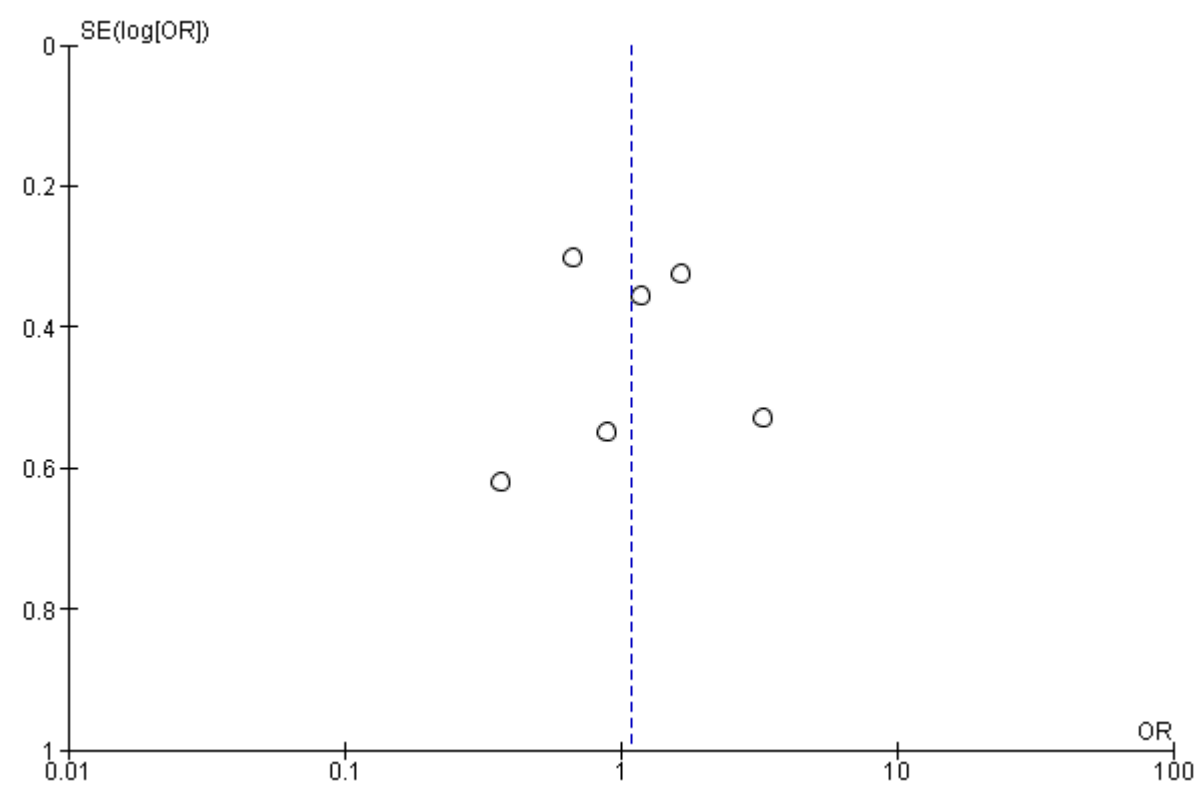

Supplementary Table S1: Continuous baseline characteristics of the included studies.

| <i>Study</i>                       | <b>Diabetes<br/>Sarcopenic<br/>%</b> | <b>Diabetes<br/>Non-<br/>Sarcopenic<br/>%</b> | <b>HTN<br/>Sarcopenic<br/>%</b> | <b>HTN Non-<br/>Sarcopenic<br/>%</b> | <b>CKD<br/>Sarcopenic<br/>%</b> | <b>CKD Non-<br/>Sarcopenic<br/>%</b> | <b>CVD<br/>Sarcopenic<br/>%</b> | <b>CVD Non-<br/>Sarcopenic<br/>%</b> |
|------------------------------------|--------------------------------------|-----------------------------------------------|---------------------------------|--------------------------------------|---------------------------------|--------------------------------------|---------------------------------|--------------------------------------|
| <i>Shen et al. 2023</i>            | 50.0                                 | 48.98                                         | 75.0                            | 80.61                                | 4.54                            | 5.44                                 | 15.90                           | 14.96                                |
| <i>Shibasaki et al. 2022</i>       | 37.5                                 | 35.0                                          | 73.61                           | 79.17                                | 23.61                           | 8.33                                 | N/A                             | N/A                                  |
| <i>Kondo et al. 2022</i>           | 24.14                                | 22.52                                         | 51.72                           | 67.57                                | 10.34                           | 14.41                                | 3.44                            | 3.60                                 |
| <i>Okamura et al. 2020</i>         | 50.0                                 | 46.05                                         | 60.53                           | 66.23                                | 23.68                           | 12.28                                | 14.4                            | 13.15                                |
| <i>Yuenyongchaiwat et al. 2020</i> | 100.0                                | 21.37                                         | 79.07                           | 67.52                                | 20.93                           | 12.82                                | N/A                             | N/A                                  |
| <i>Oh et. 2020</i>                 | N/A                                  | N/A                                           | N/A                             | N/A                                  | N/A                             | N/A                                  | N/A                             | N/A                                  |
| <i>Kiryia et al. 2020</i>          | 38.10                                | 38.46                                         | 84.13                           | 74.13                                | N/A                             | N/A                                  | N/A                             | N/A                                  |
| <i>Kurumisawa et al. 2019</i>      | N/A                                  | N/A                                           | 74.29                           | 67.96                                | N/A                             | N/A                                  | 28.57                           | 19.41                                |
| <i>Teng et al. 2019</i>            | 23.88                                | 30.29                                         | 55.22                           | 54.86                                | 20.89                           | 9.71                                 | N/A                             | N/A                                  |
| <i>Hawkins et al. 2018</i>         | 43.33                                | 45.56                                         | 85.0                            | 90.0                                 | N/A                             | N/A                                  | 15                              | 10                                   |

|                         |       |       |       |       |       |       |     |     |
|-------------------------|-------|-------|-------|-------|-------|-------|-----|-----|
| <i>Yamashita et al.</i> | 29.27 | 37.47 | 56.74 | 67.44 | N/A   | N/A   | N/A | N/A |
| 2017                    |       |       |       |       |       |       |     |     |
| <i>Ikeno</i>            | 19.75 | 18.38 | 79.01 | 89.73 | 66.66 | 60.54 | N/A | N/A |
